# Supplementary material for: Incidence, risk factors and outcomes of early post-operative stroke in a university-based, tertiary care hospital: A 7-year retrospective case-control study
Source: PubMed Central journal article supplement — Medicine (Baltimore). 2023 Jul 14;102(28):e34363. doi: 10.1097/MD.0000000000034363 (PMC10344524; doi:10.1097/md.0000000000034363), 2023-07-14
Supplement: medi-102-e34363-s001.pdf [file medi-102-e34363-s001.pdf]

**Supplementary table 1.** Types of strokes and their vascular territories

| Year         | Types of strokes |             | Vascular territories |       |       |        |       |           |                  |       |       |           |
|--------------|------------------|-------------|----------------------|-------|-------|--------|-------|-----------|------------------|-------|-------|-----------|
|              |                  |             | Single vessel        |       |       |        |       |           | Combined vessels |       |       | Not clear |
|              | Ischemic         | Hemorrhagic | Large (L)            |       |       |        |       | Small (S) | L+L              | L+S   | S+S   |           |
|              |                  |             | CCA                  | ICA   | ACA   | MCA    | PCA   |           |                  |       |       |           |
| 2015         | 4                | 0           | 1                    | 1     | 0     | 0      | 0     | 1         | 1                | 0     | 0     | 0         |
| 2016         | 1                | 1           | 0                    | 0     | 0     | 0      | 0     | 0         | 1                | 0     | 0     | 1         |
| 2017         | 3                | 1           | 0                    | 1     | 0     | 1      | 0     | 0         | 0                | 0     | 0     | 2         |
| 2018         | 6                | 0           | 0                    | 0     | 1     | 3      | 1     | 0         | 1                | 0     | 0     | 0         |
| 2019         | 13               | 1           | 0                    | 0     | 3     | 7      | 1     | 0         | 2                | 0     | 0     | 1         |
| 2020         | 7                | 2           | 0                    | 1     | 0     | 2      | 0     | 0         | 1                | 2     | 0     | 3         |
| 2021         | 4                | 0           | 0                    | 0     | 0     | 1      | 1     | 0         | 0                | 1     | 1     | 0         |
| <b>Total</b> | 38               | 5           | 1                    | 3     | 4     | 14     | 3     | 1         | 6                | 3     | 1     | 7         |
| <b>(%)</b>   | (88.4)           | (11.6)      | (2.3)                | (7.0) | (9.3) | (32.6) | (7.0) | (2.3)     | (14.0)           | (7.0) | (2.3) | (16.3)    |

CCA= Common carotid artery; ICA= Internal carotid artery; ACA= Anterior cerebral artery; MCA= Middle cerebral artery; PCA= Posterior cerebral artery; L= Large vessel; S= Small vessel i.e., Superior cerebellar artery, Anterior choroidal artery, Perforating artery, etc.

Not clear: No documentation of vascular territories, mostly from hemorrhagic strokes (5) and a few from ischemic strokes (2).
